# Supplementary material for: Current status of assisted reproductive technology in Korea, 2009
Source: PubMed Central journal article supplement — Obstet Gynecol Sci. 2013 Nov 15;56(6):353–61. doi: 10.5468/ogs.2013.56.6.353 (PMC3859020; doi:10.5468/ogs.2013.56.6.353), 2013-11-15
Supplement: ogs-56-353-s001.pdf [file ogs-56-353-s001.pdf]

**Suppl. 1.** *In vitro* fertilization centers participated in this survey.

1. Ajou University Medical Center (아주대학교병원, 수원)
2. Asan Medical Center (서울아산병원, 서울)
3. Boram Women's Hospital (보람병원, 울산)
4. Bundang Cheil Women's Hospital (분당제일여성병원, 성남)
5. Bundang CHA Medical Center (분당차병원, 성남)
6. Cha's OB & GYN Clinic (차산부인과의원, 제주)
7. Chonbuk National University Hospital (전북대학교병원, 전주)
8. Chosun University Hospital (조선대학교병원, 광주)
9. Chonnam National University Hospital (전남대학교병원, 광주)
10. Korea University Anam Hospital (고려대학교의과대학 부속병원, 서울)
11. Seoul National University Hospital (서울대학교병원, 서울)
12. Cheil General Hospital (제일병원, 서울)
13. Dongguk University Gyeongju Hospital (동국대학교 경주병원, 경주)
14. Dongwon Women's Hospital (동원산부인과의원, 고양)
15. Dong-A University Hospital (동아대학교병원, 부산)
16. Dr. Lee OB & GY Clinic (이도근산부인과의원, 진주)
17. Ellemedi OB/GYN Clinic (엘르메디산부인과의원, 창원)
18. Eulji University Hospital, Daejeon (을지대학병원, 대전)
19. Eulji University Hospital, Seoul (을지병원, 서울)
20. Ewha Womans University Mokdong Hospital (이화여대부속 목동병원, 서울)
21. CHA General Hospital (차병원, 서울)
22. Fraumedi Hospital (프라우메디병원, 울산)
23. Gangseo Mizmedi Hospital (강서미즈메디병원, 서울)
24. Good Moonhwa Hospital (좋은문화병원, 부산)
25. Gyeongsang National University Hospital (경상대학교병원, 진주)
26. Hamchoon Women's Clinic (함춘여성의원, 서울)
27. Hanna Women's Clinic (한나산부인과의원, 서울)
28. Hanyang University Medical Center\* (한양대학교병원, 서울)
29. Hosan Women's Hospital\* (호산산부인과병원, 서울)
30. H-Cube Hospital (에이치큐브병원, 서울)
31. I MOM Fertility Clinic (포항아이맘산부인과, 포항)
32. Konyang University Hospital (건양대학교병원, 대전)
33. Ilsan Jeil Women's Hospital (일산제일병원, 일산)
34. Ilsin Christian Hospital (일신기독병원, 부산)
35. Inha Univeristy Hospital (인하대학교 의과대학 부속병원, 인천)
36. Injung Hospital (인정병원, 서울)
37. Ion Women's Clinic (아이온산부인과의원, 서울)
38. Jang's Women's Hospital (장스여성병원, 서울)
39. Jeil OBGY (제일산부인과의원, 익산)
40. Jin OBGY Clinic (진산부인과의원, 전주)
41. Kangneung Miz OBGYN (강릉미즈산부인과의원, 강릉)
42. Keimyung University Dongsan Medical Center (계명대학교동산병원, 대구)
43. Kwangju Christian Hospital (광주기독병원, 광주)
44. Kyung Hee University Medical Center (경희대부속병원, 서울)
45. Kyungpook National University Hospital (경북대학교병원, 대구)
46. Mama papa & Baby (마마파파&베이비 산부인과의원, 울산)
47. Maria Fertility Hospital (마리아병원, 서울)
48. Maria Fertility Clinic, Busan (마리아의원, 부산)
49. Maria Fertility Hospital, Daegu (마리아의원, 대구)
50. Maria Fertility Hospital, Ilsan (마리아의원, 고양)
51. Maria Plus Fertility Hospital (송파 마리아병원, 서울)
52. Medipark OB/GY (메디파크산부인과병원, 성남)
53. Medi-I Woamn Hospital (메디아이여성병원, 서울)
54. Mirae and Heemang OBGY, Kwangjoo (광주미래와희망산부인과의원, 광주)
55. Mirae and Heemang OBGY, Seoul (미래와희망산부인과의원, 서울)
56. Mirae Lady's Hospital (미래여성병원, 대전)
57. Mirae Women's Hospital Infertility Lab (미래여성병원, 대구)
58. Mizmedi Hospital (강남미즈메디병원, 서울)
59. Premedi Womens Clinic (프레메디 산부인과의원, 광주)
60. Primo OB & GYN\* (프리모산부인과의원, 청주)
61. Pusan National University Hospital (부산대학교병원, 부산)
62. Saewha Hospital (세화병원, 부산)
63. Samsung Medical Center (삼성서울병원, 서울)
64. Samsung-Mirae Obstetrics & Gynecology (삼성미래산부인과, 부천)
65. Seoul Women's Hospital, Daejeon (서울여성병원, 대전)
66. Seoul Women's Hospital, Incheon (서울여성병원, 인천)
67. Shin Woman's Hospital\* (신여성병원, 의정부)
68. Sungmo Woman's Hospital\* (성모여성병원, 대구)
69. Taegu CHA Medical Hospital (대구여성차병원, 대구)
70. Women-I Hospital (여성아이병원, 포항)
71. Wonju Christian Hospital (원주기독병원, 원주)
72. Severance Hospital (신촌세브란스병원, 서울)
73. Yoensei Women & Children's Hospital\* (연세모아병원, 수원)
74. The Wise Hwang Hospital\* (더와이즈황병원, 서울)

\*Reported no case in the year of 2009 (in alphabetical order).
