# Supplementary material for: Current status of assisted reproductive technology in Korea, 2009
Source: PubMed Central journal article supplement — Obstet Gynecol Sci. 2013 Nov 15;56(6):353–61. doi: 10.5468/ogs.2013.56.6.353 (PMC3859020; doi:10.5468/ogs.2013.56.6.353), 2013-11-15
Supplement: ogs-56-353-s002.pdf [file ogs-56-353-s002.pdf]

**Suppl. 2.** Registration form of assisted reproduction: 2009.

## 2009년도 보조생식술 시술결과 보고서

### REGISTRATION FORM OF ASSISTED REPRODUCTION: 2009

PLEASE READ INSTRUCTIONS AND FOOTNOTES CAREFULLY BEFORE COMPLETING THE FORMS

|                                 |  |     |  |     |  |
|---------------------------------|--|-----|--|-----|--|
| Name of IVF Center (in Korean)  |  |     |  |     |  |
| Name of IVF Center (in English) |  |     |  |     |  |
| Contact Person Name (in Korean) |  | Tel |  | Fax |  |
| E-mail                          |  |     |  |     |  |
| Address (in Korean)             |  |     |  |     |  |

World report에 각 기관의 영문명이 첨부됩니다. 정확한 영문 기관이름을 적어주십시오.

All data relate to treatment cycles that were started during the calendar year, 2009, and to any clinical pregnancies resulting from those treatment cycles. Please complete as many data items as possible (n=number). If data are not available for some items, write NA. Gestational age (duration of pregnancy) should be calculated by adding 14 days (2 weeks) to the number of completed weeks between the date of fertilization (conception) and the date of completion of the pregnancy

**In the following tables:**

- **Standard IVF (IVF without ICSI)** includes those treatment cycles and pregnancies in which fertilization occurred, or was intended to occur, in the laboratory and fresh embryos were transferred to the uterus or fallopian tubes. **This heading excludes: (1) frozen/thawed embryo transfer cycles; and (2) microinsemination techniques.**
- **ICSI** includes those treatment cycles and pregnancies that follow transfer of fresh embryos after intracytoplasmic sperm injection. Transfer cycles after both ICSI and embryo freezing are recorded separately.
- **GIFT** includes only those cycles and pregnancies in which gametes (oocytes and sperm) were transferred to the fallopian tubes (excluding combined IVF and GIFT in the same cycle, which should be recorded in IVF category).

주의: 본 보고서에서 ART procedure를 1) Standard IVF (IVF without ICSI), 2) ICSI, 3) ZIFT 4) GIFT, 5) FET (Frozen Embryo Transfer) after standard IVF, 6) FET after ICSI, 7) Oocyte donation의 7가지로 구분하고 있습니다. 그리고 이 항목들의 대상은 상호 중첩되지 않으니 숫자 기입 시 유의하시기 바랍니다.

If you did not perform ART practice in 2009, check here  Not done

If you performed ART practice in 2009, please fill out tables below.

## ART Report Forms, Korea 2009

### Module Ia Pregnancy Outcomes in Relation to Treatment

**Table 1a-1.** Pregnancy outcomes: IVF, ICSI, ZIFT, GIFT

|                                                        | IVF without ICSI<br>(n) | IVF with ICSI<br>(n) | ZIFT<br>(n) | GIFT<br>(n) |
|--------------------------------------------------------|-------------------------|----------------------|-------------|-------------|
| Initiated cycles                                       |                         |                      |             |             |
| Cycles with oocyte retrieval attempted<br>(aspiration) |                         |                      |             |             |
| Transfers                                              |                         |                      |             |             |
| 1 embryo (oocyte <sup>1</sup> )                        |                         |                      |             |             |
| 2 embryos (oocytes)                                    |                         |                      |             |             |
| 3 embryos (oocytes)                                    |                         |                      |             |             |
| 4 embryos (oocytes)                                    |                         |                      |             |             |
| 5 embryos (oocytes)                                    |                         |                      |             |             |
| ≥6 embryos (oocytes)                                   |                         |                      |             |             |
| All                                                    |                         |                      |             |             |
| Clinical pregnancies <sup>2</sup> (intrauterine)       |                         |                      |             |             |
| Pregnancy losses <sup>3</sup> (abortion)               |                         |                      |             |             |
| Pregnancies with one or more live births               |                         |                      |             |             |
| Lost to follow-up <sup>4</sup>                         |                         |                      |             |             |

\* **This table excludes cycles in which frozen/thawed embryos were transferred.**

(이 테이블에는 frozen/thawed embryo를 사용한 cycle은 포함하지 않습니다.)

<sup>1</sup>: in case of GIFT

<sup>2</sup>: Clinical pregnancy: Presence of an **intrauterine** gestational sac on ultrasound examination

(Clinical pregnancy는 초음파에서 자궁내 태낭을 확인한 경우로 제한됩니다.)

<sup>3</sup>: Clinical pregnancy (intrauterine)가 확인되었으나 임신 20주 이전 abortion된 경우

<sup>4</sup>: Clinical pregnancy (intrauterine)가 확인되었으나 Pregnancy outcome (abortion or delivery)을 확인하지 못한 임신의 수

**Table 1a-2.** Pregnancy outcomes after transfer of frozen/thawed embryos

|                                          | FET <sup>1</sup> : embryos obtained<br>after IVF without ICSI<br>(n) | FET: embryos obtained<br>after IVF with ICSI<br>(n) |
|------------------------------------------|----------------------------------------------------------------------|-----------------------------------------------------|
| Thawing cycles                           |                                                                      |                                                     |
| Transfers cycles                         |                                                                      |                                                     |
| 1 embryo                                 |                                                                      |                                                     |
| 2 embryos                                |                                                                      |                                                     |
| 3 embryos                                |                                                                      |                                                     |
| 4 embryos                                |                                                                      |                                                     |
| 5 embryos                                |                                                                      |                                                     |
| ≥6 embryos                               |                                                                      |                                                     |
| All                                      |                                                                      |                                                     |
| Clinical pregnancies (intrauterine)      |                                                                      |                                                     |
| Pregnancy losses <sup>2</sup> (abortion) |                                                                      |                                                     |
| Pregnancies with one or more live births |                                                                      |                                                     |
| Lost to follow-up <sup>3</sup>           |                                                                      |                                                     |

<sup>1</sup>: FET (Frozen Embryos Transfer)

<sup>2</sup>: Clinical pregnancy (intrauterine)가 확인되었으나 임신 20주 이전 abortion된 경우

<sup>3</sup>: Clinical pregnancy (intrauterine)가 확인되었으나 Pregnancy outcome (abortion or delivery)을 확인하지 못한 임신의 수

**Table 1a-3.** Pregnancy outcomes after oocyte donation

|                                          | (n) |
|------------------------------------------|-----|
| Cycle Donation                           |     |
| Transfers                                |     |
| 1 embryo                                 |     |
| 2 embryos                                |     |
| 3 embryos                                |     |
| 4 embryos                                |     |
| 5 embryos                                |     |
| ≥6 embryos                               |     |
| All                                      |     |
| Clinical pregnancies (intrauterine)      |     |
| Pregnancy losses <sup>1</sup> (abortion) |     |
| Pregnancies with one or more live births |     |
| Lost to follow-up <sup>2</sup>           |     |

<sup>1</sup>: Clinical pregnancy (intrauterine)가 확인되었으나 임신 20주 이전 abortion된 경우

<sup>2</sup>: Clinical pregnancy (intrauterine)가 확인되었으나 Pregnancy outcome (abortion or delivery)을 확인하지 못한 임신의 수

## ART Report Forms, Korea 2009

### Module Ib Complications of Treatment

**Table 1b.** Complications that require admission to hospital

| Complications                                   | (n) |
|-------------------------------------------------|-----|
| Hyperstimulation syndrome                       |     |
| Complications of oocyte retrieval               |     |
| Bleeding                                        |     |
| Infection                                       |     |
| All                                             |     |
| Maternal deaths related to the ART process      |     |
| Maternal deaths related to the pregnancy itself |     |

\* If a woman had two occurrences of the same complication, in 2 different cycles, count her twice.

\* If a woman had two different complications, count her in each of them.

## ART Report Forms, Korea 2009

### Module 2 Deliveries in Relation to Treatment

**Table 2-1.** Standard IVF (IVF without ICSI)

|                                 | (n) |
|---------------------------------|-----|
| Singleton deliveries            |     |
| Twin deliveries                 |     |
| Triplet deliveries              |     |
| Quadruplet or higher deliveries |     |
| Unknown                         |     |
| All deliveries                  |     |
| All clinical pregnancies        |     |

\* Deliveries, not babies.

**Table 2-2.** ICSI (IVF with ICSI)

|                                 | (n) |
|---------------------------------|-----|
| Singleton deliveries            |     |
| Twin deliveries                 |     |
| Triplet deliveries              |     |
| Quadruplet or higher deliveries |     |
| Unknown                         |     |
| All deliveries                  |     |
| All clinical pregnancies        |     |

\* Deliveries, not babies.

**Table 2-3.** Frozen Embryo Transfer

|                                 | (n) |
|---------------------------------|-----|
| Singleton deliveries            |     |
| Twin deliveries                 |     |
| Triplet deliveries              |     |
| Quadruplet or higher deliveries |     |
| Unknown                         |     |
| All deliveries                  |     |
| All clinical pregnancies        |     |

\* Deliveries, not babies.

**Table 2-4.** Oocyte Donation

|                                 | (n) |
|---------------------------------|-----|
| Singleton deliveries            |     |
| Twin deliveries                 |     |
| Triplet deliveries              |     |
| Quadruplet or higher deliveries |     |
| Unknown                         |     |
| All deliveries                  |     |
| All clinical pregnancies        |     |

\* Deliveries, not babies.

**Table 2-5.** Induced Abortions (not SFR)

|                        | (n) |
|------------------------|-----|
| Standard IVF           |     |
| ICSI                   |     |
| Frozen Embryo Transfer |     |
| Oocyte Donation        |     |

**Table 2-6.** Induced Reductions (SFR)

|                        | (n) |
|------------------------|-----|
| Standard IVF           |     |
| ICSI                   |     |
| Frozen Embryo Transfer |     |
| Oocyte Donation        |     |

## ART Report Forms, Korea 2009

### Module 3a

## Perinatal Mortality in relation to Treatment and Multiple Deliveries

**Table 3a-1.** Fresh cycles (total aspiration cycles following IVF and/or ICSI)  
(Not the number of deliveries, but number of babies)

| Pregnancy order      | Health status in the perinatal period |             |             |                 |         |
|----------------------|---------------------------------------|-------------|-------------|-----------------|---------|
|                      | Number of neonates                    | Stillbirths | Live births | Neonatal deaths | Unknown |
| Singleton            |                                       |             |             |                 |         |
| Twin                 |                                       |             |             |                 |         |
| Triplet              |                                       |             |             |                 |         |
| Quadruplet or higher |                                       |             |             |                 |         |
| Unknown              |                                       |             |             |                 |         |
| Total                |                                       |             |             |                 |         |

*This table excludes PGD and OD.*

*This table reports number of neonates (2 for twins, 3 for triplet, and so fort.).*

**Table 3a-2.** FET cycles (total transfer cycles following IVF and/or ICSI)  
(Not the number of deliveries, but number of babies)

| Pregnancy order      | Health status in the perinatal period<br>Number of neonates |             |             |                 |         |
|----------------------|-------------------------------------------------------------|-------------|-------------|-----------------|---------|
|                      | Total                                                       | Stillbirths | Live births | Neonatal deaths | Unknown |
| Singleton            |                                                             |             |             |                 |         |
| Twin                 |                                                             |             |             |                 |         |
| Triplet              |                                                             |             |             |                 |         |
| Quadruplet or higher |                                                             |             |             |                 |         |
| Unknown              |                                                             |             |             |                 |         |
| Total                |                                                             |             |             |                 |         |

*This table excludes PGD and OD.*

*This table reports number of neonates (2 for twins, 3 for triplet, and so fort.).*

**Table 3a-3.** Oocyte donation (total transfer cycles following IVF and/or ICSI)  
(Not the number of deliveries, but number of babies)

| Pregnancy order      | Health status in the perinatal period<br>Number of neonates |             |             |                 |         |
|----------------------|-------------------------------------------------------------|-------------|-------------|-----------------|---------|
|                      | Total                                                       | Stillbirths | Live births | Neonatal deaths | Unknown |
| Singleton            |                                                             |             |             |                 |         |
| Twin                 |                                                             |             |             |                 |         |
| Triplet              |                                                             |             |             |                 |         |
| Quadruplet or higher |                                                             |             |             |                 |         |
| Unknown              |                                                             |             |             |                 |         |
| Total                |                                                             |             |             |                 |         |

*This table excludes PGD.*

*This table reports number of neonates (2 for twins, 3 for triplet, and so fort.).*

- Live births: ≥20 weeks.
- Stillbirths: ≥20 weeks.
- Neonatal deaths are all the deaths occurring after birth, up to 7 completed days of life.
- Stillborn include deaths occurring during the delivery process.

## ART Report Forms, Korea 2009

### Module 3b Malformations in Relation to Treatment (includes chromosomal abnormalities)

**Table 3b.** Standard IVF (IVF without ICSI), ICSI (IVF with ICSI), FET (Frozen Embryo Transfer with/without ICSI), Oocyte Donation, PGD, GIFT

| Technique             | number of neonates/fetuses with congenital anomalies* |             |             |         |       |
|-----------------------|-------------------------------------------------------|-------------|-------------|---------|-------|
|                       | Total                                                 | Delivered** | Abortion    |         |       |
|                       |                                                       |             | Spontaneous | Induced | Total |
| IVF fresh cycle       |                                                       |             |             |         |       |
| ICSI fresh cycle      |                                                       |             |             |         |       |
| FET (IVF and/or ICSI) |                                                       |             |             |         |       |
| Oocyte donation       |                                                       |             |             |         |       |
| PGD                   |                                                       |             |             |         |       |
| GIFT                  |                                                       |             |             |         |       |
| TOTAL                 |                                                       |             |             |         |       |

\*: malformations and genetic abnormalities.

\*\* : including stillbirths and those with unknown health status at birth.

Delivery ≥20 weeks, abortion <20 weeks.

Please list malformations which were reported, if available:

**Table 3c.** List of congenital anomalies (Malformations and genetic abnormalities)

| Baby | Congenital anomalies<br>(Describe all anomalies found in each baby) | Woman's<br>Age* | ART        |                   | Gestational<br>age at birth /<br>abortion* | Status* |
|------|---------------------------------------------------------------------|-----------------|------------|-------------------|--------------------------------------------|---------|
|      |                                                                     |                 | Technique* | Semen /<br>sperm* |                                            |         |
| 1.   |                                                                     |                 |            |                   |                                            |         |
| 2.   |                                                                     |                 |            |                   |                                            |         |
| 3.   |                                                                     |                 |            |                   |                                            |         |
| 4.   |                                                                     |                 |            |                   |                                            |         |
| 5.   |                                                                     |                 |            |                   |                                            |         |
| 6.   |                                                                     |                 |            |                   |                                            |         |
| 7.   |                                                                     |                 |            |                   |                                            |         |
| 8.   |                                                                     |                 |            |                   |                                            |         |
| 9.   |                                                                     |                 |            |                   |                                            |         |
| 10.  |                                                                     |                 |            |                   |                                            |         |

\*Notes:

Woman's age at conception.

ART technique: IVF, ICSI, FET (IVF or ICSI), oocyte donation, GIFT.

ART semen/sperm: ejaculated (spouse / donor), TESE, MESA, fresh or frozen.

Gestational age: completed weeks of amenorrhea (see the comment on form 5).

Status: Spontaneous abortion, Induced abortion, Stillbirth, Live Birth, Neonatal death.

Please copy and use additional pages as necessary.



## ART Report Forms, Korea 2009

### Module 4 Clinical Outcomes by Maternal Age, Cause of Infertility

**Table 4-1.** Number of oocyte retrieval cycles and clinical pregnancies by maternal age, 2009

| Women's age at start of treatment | Standard IVF (IVF without ICSI) |                                            |                          |                                              |                                              |                                    |
|-----------------------------------|---------------------------------|--------------------------------------------|--------------------------|----------------------------------------------|----------------------------------------------|------------------------------------|
|                                   | Initiated cycles (n)            | Cycles with oocyte retrieval attempted (n) | Clinical pregnancies (n) | Pregnancy losses <sup>1</sup> (abortion) (n) | Pregnancies with one or more live births (n) | Lost to follow-up <sup>2</sup> (n) |
| <25 yr                            |                                 |                                            |                          |                                              |                                              |                                    |
| 25-29                             |                                 |                                            |                          |                                              |                                              |                                    |
| 30-34                             |                                 |                                            |                          |                                              |                                              |                                    |
| 35-39                             |                                 |                                            |                          |                                              |                                              |                                    |
| > 40                              |                                 |                                            |                          |                                              |                                              |                                    |

<sup>1</sup>: Clinical pregnancy (intrauterine)가 확인되었으나 임신 20주 이전 abortion된 경우

<sup>2</sup>: Clinical pregnancy (intrauterine)가 확인되었으나 Pregnancy outcome (abortion or delivery)을 확인하지 못한 임신의 수

| Women's age at start of treatment | IVF with ICSI        |                                            |                          |                                              |                                              |                                    |
|-----------------------------------|----------------------|--------------------------------------------|--------------------------|----------------------------------------------|----------------------------------------------|------------------------------------|
|                                   | Initiated cycles (n) | Cycles with oocyte retrieval attempted (n) | Clinical pregnancies (n) | Pregnancy losses <sup>1</sup> (abortion) (n) | Pregnancies with one or more live births (n) | Lost to follow-up <sup>2</sup> (n) |
| <25 yr                            |                      |                                            |                          |                                              |                                              |                                    |
| 25-29                             |                      |                                            |                          |                                              |                                              |                                    |
| 30-34                             |                      |                                            |                          |                                              |                                              |                                    |
| 35-39                             |                      |                                            |                          |                                              |                                              |                                    |
| > 40                              |                      |                                            |                          |                                              |                                              |                                    |

<sup>1</sup>: Clinical pregnancy (intrauterine)가 확인되었으나 임신 20주 이전 abortion된 경우

<sup>2</sup>: Clinical pregnancy (intrauterine)가 확인되었으나 Pregnancy outcome (abortion or delivery)을 확인하지 못한 임신의 수

| Women's age at start of treatment | Frozen embryo transfers after IVF without ICSI |                                 |                          |                                              |                                              |                                    |
|-----------------------------------|------------------------------------------------|---------------------------------|--------------------------|----------------------------------------------|----------------------------------------------|------------------------------------|
|                                   | Thawing cycles (n)                             | Cycles with embryo transfer (n) | Clinical pregnancies (n) | Pregnancy losses <sup>1</sup> (abortion) (n) | Pregnancies with one or more live births (n) | Lost to follow-up <sup>2</sup> (n) |
| <25 yr                            |                                                |                                 |                          |                                              |                                              |                                    |
| 25-29                             |                                                |                                 |                          |                                              |                                              |                                    |
| 30-34                             |                                                |                                 |                          |                                              |                                              |                                    |
| 35-39                             |                                                |                                 |                          |                                              |                                              |                                    |
| > 40                              |                                                |                                 |                          |                                              |                                              |                                    |

<sup>1</sup>: Clinical pregnancy (intrauterine)가 확인되었으나 임신 20주 이전 abortion된 경우

<sup>2</sup>: Clinical pregnancy (intrauterine)가 확인되었으나 Pregnancy outcome (abortion or delivery)을 확인하지 못한 임신의 수

| Frozen embryo transfers after IVF with ICSI |                    |                                 |                          |                                              |                                              |                                    |
|---------------------------------------------|--------------------|---------------------------------|--------------------------|----------------------------------------------|----------------------------------------------|------------------------------------|
| Women's age at start of treatment           | Thawing cycles (n) | Cycles with embryo transfer (n) | Clinical pregnancies (n) | Pregnancy losses <sup>1</sup> (abortion) (n) | Pregnancies with one or more live births (n) | Lost to follow-up <sup>2</sup> (n) |
| <25 yr                                      |                    |                                 |                          |                                              |                                              |                                    |
| 25-29                                       |                    |                                 |                          |                                              |                                              |                                    |
| 30-34                                       |                    |                                 |                          |                                              |                                              |                                    |
| 35-39                                       |                    |                                 |                          |                                              |                                              |                                    |
| > 40                                        |                    |                                 |                          |                                              |                                              |                                    |

<sup>1</sup>: Clinical pregnancy (intrauterine)가 확인되었으나 임신 20주 이전 abortion된 경우

<sup>2</sup>: Clinical pregnancy (intrauterine)가 확인되었으나 Pregnancy outcome (abortion or delivery)을 확인하지 못한 임신의 수

| ZIFT                              |                      |                                            |                          |                                              |                                              |                                    |
|-----------------------------------|----------------------|--------------------------------------------|--------------------------|----------------------------------------------|----------------------------------------------|------------------------------------|
| Women's age at start of treatment | Initiated cycles (n) | Cycles with oocyte retrieval attempted (n) | Clinical pregnancies (n) | Pregnancy losses <sup>1</sup> (abortion) (n) | Pregnancies with one or more live births (n) | Lost to follow-up <sup>2</sup> (n) |
| <25 yr                            |                      |                                            |                          |                                              |                                              |                                    |
| 25-29                             |                      |                                            |                          |                                              |                                              |                                    |
| 30-34                             |                      |                                            |                          |                                              |                                              |                                    |
| 35-39                             |                      |                                            |                          |                                              |                                              |                                    |
| > 40                              |                      |                                            |                          |                                              |                                              |                                    |

<sup>1</sup>: Clinical pregnancy (intrauterine)가 확인되었으나 임신 20주 이전 abortion된 경우

<sup>2</sup>: Clinical pregnancy (intrauterine)가 확인되었으나 Pregnancy outcome (abortion or delivery)을 확인하지 못한 임신의 수

| GIFT                              |                      |                                            |                          |                                              |                                              |                                    |
|-----------------------------------|----------------------|--------------------------------------------|--------------------------|----------------------------------------------|----------------------------------------------|------------------------------------|
| Women's age at start of treatment | Initiated cycles (n) | Cycles with oocyte retrieval attempted (n) | Clinical pregnancies (n) | Pregnancy losses <sup>1</sup> (abortion) (n) | Pregnancies with one or more live births (n) | Lost to follow-up <sup>2</sup> (n) |
| <25 yr                            |                      |                                            |                          |                                              |                                              |                                    |
| 25-29                             |                      |                                            |                          |                                              |                                              |                                    |
| 30-34                             |                      |                                            |                          |                                              |                                              |                                    |
| 35-39                             |                      |                                            |                          |                                              |                                              |                                    |
| > 40                              |                      |                                            |                          |                                              |                                              |                                    |

<sup>1</sup>: Clinical pregnancy (intrauterine)가 확인되었으나 임신 20주 이전 abortion된 경우

<sup>2</sup>: Clinical pregnancy (intrauterine)가 확인되었으나 Pregnancy outcome (abortion or delivery)을 확인하지 못한 임신의 수

| Oocyte Donation                   |                      |                                            |                          |                                              |                                              |                                    |
|-----------------------------------|----------------------|--------------------------------------------|--------------------------|----------------------------------------------|----------------------------------------------|------------------------------------|
| Women's age at start of treatment | Initiated cycles (n) | Cycles with oocyte retrieval attempted (n) | Clinical pregnancies (n) | Pregnancy losses <sup>1</sup> (abortion) (n) | Pregnancies with one or more live births (n) | Lost to follow-up <sup>2</sup> (n) |
| <25 yrs                           |                      |                                            |                          |                                              |                                              |                                    |
| 25-29                             |                      |                                            |                          |                                              |                                              |                                    |
| 30-34                             |                      |                                            |                          |                                              |                                              |                                    |
| 35-39                             |                      |                                            |                          |                                              |                                              |                                    |
| > 40                              |                      |                                            |                          |                                              |                                              |                                    |

<sup>1</sup>: Clinical pregnancy (intrauterine)가 확인되었으나 임신 20주 이전 abortion된 경우

<sup>2</sup>: Clinical pregnancy (intrauterine)가 확인되었으나 Pregnancy outcome (abortion or delivery)을 확인하지 못한 임신의 수

# Obstetrics & Gynecology Science

Young Min Choi, et al. Current Status of ART in Korea, 2009

**Table 4-2.** Number of oocyte retrieval cycles and clinical pregnancies by cause(s) of infertility, 2009

| Cause(s) of infertility | Standard IVF (IVF without ICSI) |                                            |                          |                                              |                                              |                                    |
|-------------------------|---------------------------------|--------------------------------------------|--------------------------|----------------------------------------------|----------------------------------------------|------------------------------------|
|                         | Initiated cycles (n)            | Cycles with oocyte retrieval attempted (n) | Clinical pregnancies (n) | Pregnancy losses <sup>1</sup> (abortion) (n) | Pregnancies with one or more live births (n) | Lost to follow-up <sup>2</sup> (n) |
| Female only             |                                 |                                            |                          |                                              |                                              |                                    |
| Male factor only        |                                 |                                            |                          |                                              |                                              |                                    |
| Mixed male and female   |                                 |                                            |                          |                                              |                                              |                                    |
| Unexplained             |                                 |                                            |                          |                                              |                                              |                                    |
| Other factors           |                                 |                                            |                          |                                              |                                              |                                    |

The groups in the sections on cause of infertility are mutually exclusive so each treatment cycle or pregnancy should be included in only one group.

<sup>1</sup>: Clinical pregnancy (intrauterine)가 확인되었으나 임신 20주 이전 abortion된 경우

<sup>2</sup>: Clinical pregnancy (intrauterine)가 확인되었으나 Pregnancy outcome (abortion or delivery)을 확인하지 못한 임신의 수

| Cause(s) of infertility | IVF with ICSI        |                                            |                          |                                              |                                              |                                    |
|-------------------------|----------------------|--------------------------------------------|--------------------------|----------------------------------------------|----------------------------------------------|------------------------------------|
|                         | Initiated cycles (n) | Cycles with oocyte retrieval attempted (n) | Clinical pregnancies (n) | Pregnancy losses <sup>1</sup> (abortion) (n) | Pregnancies with one or more live births (n) | Lost to follow-up <sup>2</sup> (n) |
| Female only             |                      |                                            |                          |                                              |                                              |                                    |
| Male factor only        |                      |                                            |                          |                                              |                                              |                                    |
| Mixed male and female   |                      |                                            |                          |                                              |                                              |                                    |
| Unexplained             |                      |                                            |                          |                                              |                                              |                                    |
| Other factors           |                      |                                            |                          |                                              |                                              |                                    |

The groups in the sections on cause of infertility are mutually exclusive so each treatment cycle or pregnancy should be included in only one group.

<sup>1</sup>: Clinical pregnancy (intrauterine)가 확인되었으나 임신 20주 이전 abortion된 경우

<sup>2</sup>: Clinical pregnancy (intrauterine)가 확인되었으나 Pregnancy outcome (abortion or delivery)을 확인하지 못한 임신의 수

| Cause(s) of infertility | ZIFT                 |                                            |                          |                                              |                                              |                                    |
|-------------------------|----------------------|--------------------------------------------|--------------------------|----------------------------------------------|----------------------------------------------|------------------------------------|
|                         | Initiated cycles (n) | Cycles with oocyte retrieval attempted (n) | Clinical pregnancies (n) | Pregnancy losses <sup>1</sup> (abortion) (n) | Pregnancies with one or more live births (n) | Lost to follow-up <sup>2</sup> (n) |
| Female only             |                      |                                            |                          |                                              |                                              |                                    |
| Male factor only        |                      |                                            |                          |                                              |                                              |                                    |
| Mixed male and female   |                      |                                            |                          |                                              |                                              |                                    |
| Unexplained             |                      |                                            |                          |                                              |                                              |                                    |
| Other factors           |                      |                                            |                          |                                              |                                              |                                    |

The groups in the sections on cause of infertility are mutually exclusive so each treatment cycle or pregnancy should be included in only one group.

<sup>1</sup>: Clinical pregnancy (intrauterine)가 확인되었으나 임신 20주 이전 abortion된 경우

<sup>2</sup>: Clinical pregnancy (intrauterine)가 확인되었으나 Pregnancy outcome (abortion or delivery)을 확인하지 못한 임신의 수

| Cause(s) of infertility | GIFT                 |                                            |                          |                                              |                                              |                                    |
|-------------------------|----------------------|--------------------------------------------|--------------------------|----------------------------------------------|----------------------------------------------|------------------------------------|
|                         | Initiated cycles (n) | Cycles with oocyte retrieval attempted (n) | Clinical pregnancies (n) | Pregnancy losses <sup>1</sup> (abortion) (n) | Pregnancies with one or more live births (n) | Lost to follow-up <sup>2</sup> (n) |
| Female only             |                      |                                            |                          |                                              |                                              |                                    |
| Male factor only        |                      |                                            |                          |                                              |                                              |                                    |
| Mixed male and female   |                      |                                            |                          |                                              |                                              |                                    |
| Unexplained             |                      |                                            |                          |                                              |                                              |                                    |
| Other factors           |                      |                                            |                          |                                              |                                              |                                    |

The groups in the sections on cause of infertility are mutually exclusive so each treatment cycle or pregnancy should be included in only one group.

<sup>1</sup>: Clinical pregnancy (intrauterine)가 확인되었으나 임신 20주 이전 abortion된 경우

<sup>2</sup>: Clinical pregnancy (intrauterine)가 확인되었으나 Pregnancy outcome (abortion or delivery)을 확인하지 못한 임신의 수

| Cause(s) of infertility | Frozen embryo transfers after IVF without ICSI |                                            |                          |                                              |                                              |                                    |
|-------------------------|------------------------------------------------|--------------------------------------------|--------------------------|----------------------------------------------|----------------------------------------------|------------------------------------|
|                         | Thawing cycles (n)                             | Cycles with oocyte retrieval attempted (n) | Clinical pregnancies (n) | Pregnancy losses <sup>1</sup> (abortion) (n) | Pregnancies with one or more live births (n) | Lost to follow-up <sup>2</sup> (n) |
| Female only             |                                                |                                            |                          |                                              |                                              |                                    |
| Male factor only        |                                                |                                            |                          |                                              |                                              |                                    |
| Mixed male and female   |                                                |                                            |                          |                                              |                                              |                                    |
| Unexplained             |                                                |                                            |                          |                                              |                                              |                                    |
| Other factors           |                                                |                                            |                          |                                              |                                              |                                    |

The groups in the sections on cause of infertility are mutually exclusive so each treatment cycle or pregnancy should be included in only one group.

<sup>1</sup>: Clinical pregnancy (intrauterine)가 확인되었으나 임신 20주 이전 abortion된 경우

<sup>2</sup>: Clinical pregnancy (intrauterine)가 확인되었으나 Pregnancy outcome (abortion or delivery)을 확인하지 못한 임신의 수

| Cause(s) of infertility | Frozen embryo transfers after ICSI |                                            |                          |                                              |                                              |                                    |
|-------------------------|------------------------------------|--------------------------------------------|--------------------------|----------------------------------------------|----------------------------------------------|------------------------------------|
|                         | Thawing cycles (n)                 | Cycles with oocyte retrieval attempted (n) | Clinical pregnancies (n) | Pregnancy losses <sup>1</sup> (abortion) (n) | Pregnancies with one or more live births (n) | Lost to follow-up <sup>2</sup> (n) |
| Female only             |                                    |                                            |                          |                                              |                                              |                                    |
| Male factor only        |                                    |                                            |                          |                                              |                                              |                                    |
| Mixed male and female   |                                    |                                            |                          |                                              |                                              |                                    |
| Unexplained             |                                    |                                            |                          |                                              |                                              |                                    |
| Other factors           |                                    |                                            |                          |                                              |                                              |                                    |

The groups in the sections on cause of infertility are mutually exclusive so each treatment cycle or pregnancy should be included in only one group.

<sup>1</sup>: Clinical pregnancy (intrauterine)가 확인되었으나 임신 20주 이전 abortion된 경우

<sup>2</sup>: Clinical pregnancy (intrauterine)가 확인되었으나 Pregnancy outcome (abortion or delivery)을 확인하지 못한 임신의 수

# Obstetrics & Gynecology Science

Young Min Choi, et al. Current Status of ART in Korea, 2009

**Table 4-3.** Number of oocyte retrieval cycles and clinical pregnancies by number of embryos or oocytes transferred, 2009

| Number of embryos transferred | Standard IVF        |                          |                                              |                                              |                                        |                                   |                                              |                                    |
|-------------------------------|---------------------|--------------------------|----------------------------------------------|----------------------------------------------|----------------------------------------|-----------------------------------|----------------------------------------------|------------------------------------|
|                               | Transfer cycles (n) | Clinical pregnancies (n) | Pregnancy losses <sup>1</sup> (abortion) (n) | Pregnancies with one or more live births (n) | Deliveries: Singleton (not babies) (n) | Deliveries: Twin (not babies) (n) | Deliveries: Triplet or more (not babies) (n) | Lost to follow-up <sup>2</sup> (n) |
| One                           |                     |                          |                                              |                                              |                                        |                                   |                                              |                                    |
| Two                           |                     |                          |                                              |                                              |                                        |                                   |                                              |                                    |
| Three                         |                     |                          |                                              |                                              |                                        |                                   |                                              |                                    |
| Four                          |                     |                          |                                              |                                              |                                        |                                   |                                              |                                    |
| Five                          |                     |                          |                                              |                                              |                                        |                                   |                                              |                                    |
| Six or more                   |                     |                          |                                              |                                              |                                        |                                   |                                              |                                    |

<sup>1</sup>: Clinical pregnancy (intrauterine)가 확인되었으나 임신 20주 이전 abortion된 경우

<sup>2</sup>: Clinical pregnancy (intrauterine)가 확인되었으나 Pregnancy outcome (abortion or delivery)을 확인하지 못한 임신의 수

| Number of embryos transferred | IVF with ICSI       |                          |                                              |                                              |                                        |                                   |                                              |                                    |
|-------------------------------|---------------------|--------------------------|----------------------------------------------|----------------------------------------------|----------------------------------------|-----------------------------------|----------------------------------------------|------------------------------------|
|                               | Transfer cycles (n) | Clinical pregnancies (n) | Pregnancy losses <sup>1</sup> (abortion) (n) | Pregnancies with one or more live births (n) | Deliveries: Singleton (not babies) (n) | Deliveries: Twin (not babies) (n) | Deliveries: Triplet or more (not babies) (n) | Lost to follow-up <sup>2</sup> (n) |
| One                           |                     |                          |                                              |                                              |                                        |                                   |                                              |                                    |
| Two                           |                     |                          |                                              |                                              |                                        |                                   |                                              |                                    |
| Three                         |                     |                          |                                              |                                              |                                        |                                   |                                              |                                    |
| Four                          |                     |                          |                                              |                                              |                                        |                                   |                                              |                                    |
| Five                          |                     |                          |                                              |                                              |                                        |                                   |                                              |                                    |
| Six or more                   |                     |                          |                                              |                                              |                                        |                                   |                                              |                                    |

<sup>1</sup>: Clinical pregnancy (intrauterine)가 확인되었으나 임신 20주 이전 abortion된 경우

<sup>2</sup>: Clinical pregnancy (intrauterine)가 확인되었으나 Pregnancy outcome (abortion or delivery)을 확인하지 못한 임신의 수

| Number of embryos transferred | Frozen embryo transfers after IVF without ICSI |                          |                                              |                                              |                                        |                                   |                                              |                                    |
|-------------------------------|------------------------------------------------|--------------------------|----------------------------------------------|----------------------------------------------|----------------------------------------|-----------------------------------|----------------------------------------------|------------------------------------|
|                               | Transfer cycles (n)                            | Clinical pregnancies (n) | Pregnancy losses <sup>1</sup> (abortion) (n) | Pregnancies with one or more live births (n) | Deliveries: Singleton (not babies) (n) | Deliveries: Twin (not babies) (n) | Deliveries: Triplet or more (not babies) (n) | Lost to follow-up <sup>2</sup> (n) |
| One                           |                                                |                          |                                              |                                              |                                        |                                   |                                              |                                    |
| Two                           |                                                |                          |                                              |                                              |                                        |                                   |                                              |                                    |
| Three                         |                                                |                          |                                              |                                              |                                        |                                   |                                              |                                    |
| Four                          |                                                |                          |                                              |                                              |                                        |                                   |                                              |                                    |
| Five                          |                                                |                          |                                              |                                              |                                        |                                   |                                              |                                    |
| Six or more                   |                                                |                          |                                              |                                              |                                        |                                   |                                              |                                    |

<sup>1</sup>: Clinical pregnancy (intrauterine)가 확인되었으나 임신 20주 이전 abortion된 경우

<sup>2</sup>: Clinical pregnancy (intrauterine)가 확인되었으나 Pregnancy outcome (abortion or delivery)을 확인하지 못한 임신의 수

| Frozen embryo transfers after ICSI |                     |                          |                                              |                                              |                                        |                                   |                                              |                                    |
|------------------------------------|---------------------|--------------------------|----------------------------------------------|----------------------------------------------|----------------------------------------|-----------------------------------|----------------------------------------------|------------------------------------|
| Number of embryos transferred      | Transfer cycles (n) | Clinical pregnancies (n) | Pregnancy losses <sup>1</sup> (abortion) (n) | Pregnancies with one or more live births (n) | Deliveries: Singleton (not babies) (n) | Deliveries: Twin (not babies) (n) | Deliveries: Triplet or more (not babies) (n) | Lost to follow-up <sup>2</sup> (n) |
| One                                |                     |                          |                                              |                                              |                                        |                                   |                                              |                                    |
| Two                                |                     |                          |                                              |                                              |                                        |                                   |                                              |                                    |
| Three                              |                     |                          |                                              |                                              |                                        |                                   |                                              |                                    |
| Four                               |                     |                          |                                              |                                              |                                        |                                   |                                              |                                    |
| Five                               |                     |                          |                                              |                                              |                                        |                                   |                                              |                                    |
| Six or more                        |                     |                          |                                              |                                              |                                        |                                   |                                              |                                    |

<sup>1</sup>: Clinical pregnancy (intrauterine)가 확인되었으나 임신 20주 이전 abortion된 경우

<sup>2</sup>: Clinical pregnancy (intrauterine)가 확인되었으나 Pregnancy outcome (abortion or delivery)을 확인하지 못한 임신의 수

| ZIFT                          |                     |                          |                                              |                                              |                                        |                                   |                                              |                                    |
|-------------------------------|---------------------|--------------------------|----------------------------------------------|----------------------------------------------|----------------------------------------|-----------------------------------|----------------------------------------------|------------------------------------|
| Number of embryos transferred | Transfer cycles (n) | Clinical pregnancies (n) | Pregnancy losses <sup>1</sup> (abortion) (n) | Pregnancies with one or more live births (n) | Deliveries: Singleton (not babies) (n) | Deliveries: Twin (not babies) (n) | Deliveries: Triplet or more (not babies) (n) | Lost to follow-up <sup>2</sup> (n) |
| One                           |                     |                          |                                              |                                              |                                        |                                   |                                              |                                    |
| Two                           |                     |                          |                                              |                                              |                                        |                                   |                                              |                                    |
| Three                         |                     |                          |                                              |                                              |                                        |                                   |                                              |                                    |
| Four                          |                     |                          |                                              |                                              |                                        |                                   |                                              |                                    |
| Five                          |                     |                          |                                              |                                              |                                        |                                   |                                              |                                    |
| Six or more                   |                     |                          |                                              |                                              |                                        |                                   |                                              |                                    |

<sup>1</sup>: Clinical pregnancy (intrauterine)가 확인되었으나 임신 20주 이전 abortion된 경우

<sup>2</sup>: Clinical pregnancy (intrauterine)가 확인되었으나 Pregnancy outcome (abortion or delivery)을 확인하지 못한 임신의 수

| GIFT                          |                     |                          |                                              |                                              |                                        |                                   |                                              |                                    |
|-------------------------------|---------------------|--------------------------|----------------------------------------------|----------------------------------------------|----------------------------------------|-----------------------------------|----------------------------------------------|------------------------------------|
| Number of embryos transferred | Transfer cycles (n) | Clinical pregnancies (n) | Pregnancy losses <sup>1</sup> (abortion) (n) | Pregnancies with one or more live births (n) | Deliveries: Singleton (not babies) (n) | Deliveries: Twin (not babies) (n) | Deliveries: Triplet or more (not babies) (n) | Lost to follow-up <sup>2</sup> (n) |
| One                           |                     |                          |                                              |                                              |                                        |                                   |                                              |                                    |
| Two                           |                     |                          |                                              |                                              |                                        |                                   |                                              |                                    |
| Three                         |                     |                          |                                              |                                              |                                        |                                   |                                              |                                    |
| Four                          |                     |                          |                                              |                                              |                                        |                                   |                                              |                                    |
| Five                          |                     |                          |                                              |                                              |                                        |                                   |                                              |                                    |
| Six or more                   |                     |                          |                                              |                                              |                                        |                                   |                                              |                                    |

<sup>1</sup>: Clinical pregnancy (intrauterine)가 확인되었으나 임신 20주 이전 abortion된 경우

<sup>2</sup>: Clinical pregnancy (intrauterine)가 확인되었으나 Pregnancy outcome (abortion or delivery)을 확인하지 못한 임신의 수

## ART Report Forms, Korea 2009

### Module 5 Embryo Freezing and Other Special Techniques

**Table 5-1.** Embryo freezing, 2009

Have you ever performed embryo freezing in 2009? Yes (    ), No (    )

|                                                                                | (n) |
|--------------------------------------------------------------------------------|-----|
| Number of oocyte pick-up (OPU) cycles that resulted in embryo freezing in 2009 |     |
| Number of embryos that were frozen in 2009                                     |     |
| Total number of embryos in frozen storage <b>at present</b>                    |     |

**Table 5-2.** Oocyte retrieval cycles, transfer cycles and pregnancies using special techniques of sperm collection and/or assisted hatching, 2009

| Selected techniques                                   | Oocyte retrieval cycles attempted (n) | Transfer cycles (n) | Clinical pregnancies (n) | Pregnancy losses <sup>1</sup> (abortion) (n) | Pregnancies with one or more live births (n) | Lost to follow-up <sup>2</sup> (n) |
|-------------------------------------------------------|---------------------------------------|---------------------|--------------------------|----------------------------------------------|----------------------------------------------|------------------------------------|
| Microepididymal sperm aspiration (MESA)               |                                       |                     |                          |                                              |                                              |                                    |
| Testicular sperm extraction (TESE)                    |                                       |                     |                          |                                              |                                              |                                    |
| Other and unspecified techniques of sperm collection* |                                       |                     |                          |                                              |                                              |                                    |
| Assisted hatching                                     |                                       |                     |                          |                                              |                                              |                                    |

<sup>1</sup>: Clinical pregnancy (intrauterine)가 확인되었으나 임신 20주 이전 abortion된 경우

<sup>2</sup>: Clinical pregnancy (intrauterine)가 확인되었으나 Pregnancy outcome (abortion or delivery)을 확인하지 못한 임신의 수

\*: describe

\* 이상입니다. 기입하여 주셔서 감사드립니다.

작성시 의문점이 있으신 경우나 수정 또는 개선점이 있으시면 서울의대 산부인과 최영민 교수(전화: 02-2072-2385, HP: 010-3248-2385, Fax: 02-762-3599, E-mail: ymchoi@snu.ac.kr)에게 연락하여 주십시오.
